# Supplementary material for: Identification of immune-related genes in acute myocardial infarction based on integrated bioinformatical methods and experimental verification
Source: PeerJ journal article supplement (doi:10.7717/peerj.15058), 2023-05-16
Supplement: FilesS1_S2.zip [file FilesS1_S2.zip]

## Sheet: Sheet2
node1	node2	node1_external_id	node2_external_id	neighborhood_on_chromosome	gene_fusion	phylogenetic_cooccurrence	coexpression	experimentally_determined_interaction
IL1B	TLR4	ENSP00000263341	ENSP00000363089	0	0	0	0.564	0.402
MYO10	MMP9	ENSP00000306245	ENSP00000361405	0	0	0	0.656	0.985
NR4A3	FFAR2	ENSP00000458986	ENSP00000473159	0	0	0	0.062	0.977
TLR2	PTX3	ENSP00000260010	ENSP00000295927	0	0	0	0.611	0.656
NR4A3	SOCS2	ENSP00000482027	ENSP00000481249	0	0	0	0.234	0.867
CD14	CCL4	ENSP00000304236	ENSP00000482259	0	0	0	0.628	0
CD14	CFH	ENSP00000304236	ENSP00000356399	0	0	0	0.065	0.877
TNF	CCL4	ENSP00000398698	ENSP00000482259	0	0	0	0.463	0
GSK3B	JUN	ENSP00000324806	ENSP00000360266	0	0	0	0	0.691
IL1B	CCL20	ENSP00000263341	ENSP00000351671	0	0	0	0.602	0
TLR2	C5AR1	ENSP00000260010	ENSP00000347197	0	0	0	0.17	0
JUN	VEGFA	ENSP00000360266	ENSP00000478570	0	0	0	0.678	0
CEBPB	JUN	ENSP00000305422	ENSP00000360266	0	0	0	0.143	0.184
NR1I2	RXRA	ENSP00000336528	ENSP00000419692	0	0	0	0.062	0.675
JUN	TNF	ENSP00000360266	ENSP00000398698	0	0	0	0.845	0
IL1B	TNF	ENSP00000263341	ENSP00000398698	0	0	0	0.462	0
CCL20	TNF	ENSP00000351671	ENSP00000398698	0	0	0	0.244	0
JUN	VEGFA	ENSP00000360266	ENSP00000478570	0	0	0	0.066	0.182
NRIP1	RXRA	ENSP00000383063	ENSP00000419692	0	0	0	0	0.596
FOS	TNF	ENSP00000306245	ENSP00000398698	0	0	0	0	0
TREM1	TLR4	ENSP00000244709	ENSP00000363089	0	0	0	0.467	0
AKT3	GSK3B	ENSP00000263826	ENSP00000324806	0	0	0.222	0	0.563
CDC42	VEGFA	ENSP00000383118	ENSP00000478570	0	0	0	0	0
IL1B	NFKB2	ENSP00000263341	ENSP00000358983	0	0	0	0.423	0
IL1B	JUN	ENSP00000263341	ENSP00000360266	0	0	0	0.052	0
IRAK3	IL1B	ENSP00000261233	ENSP00000263341	0	0	0	0.151	0.056
TCF7L2	JUN	ENSP00000358404	ENSP00000360266	0	0	0	0	0
CDC42	SLIT2	ENSP00000383118	ENSP00000422591	0	0	0	0.234	0.125
FOS	TCF7L2	ENSP00000306245	ENSP00000358404	0	0	0	0	0.394
JUN	MAFB	ENSP00000360266	ENSP00000362410	0	0	0	0.089	0.464
IFNGR1	PIK3R1	ENSP00000356713	ENSP00000428056	0	0	0	0	0
IL1B	PTGS2	ENSP00000263341	ENSP00000356438	0	0	0	0.561	0
JUN	CCL4	ENSP00000360266	ENSP00000482259	0	0	0	0	0
FOS	MAFB	ENSP00000306245	ENSP00000362410	0	0	0	0.095	0.629
FOS	CCL4	ENSP00000306245	ENSP00000482259	0	0	0	0.114	0
PIK3R1	VEGFA	ENSP00000428056	ENSP00000478570	0	0	0	0	0
TNF	RXRA	ENSP00000398698	ENSP00000419692	0	0	0	0	0
TLR4	TNF	ENSP00000363089	ENSP00000398698	0	0	0	0.083	0
TLR2	PIK3R1	ENSP00000260010	ENSP00000428056	0	0	0	0	0.491
IL1B	TLR4	ENSP00000263341	ENSP00000363089	0	0	0	0.16	0
C5AR1	TLR4	ENSP00000347197	ENSP00000363089	0	0	0	0.434	0
PML	TGFBR1	ENSP00000268058	ENSP00000364133	0	0	0	0	0.226
TLR2	TNF	ENSP00000260010	ENSP00000398698	0	0	0	0.17	0
IL1B	PIK3R1	ENSP00000263341	ENSP00000428056	0	0	0	0	0
PML	TGFBR2	ENSP00000268058	ENSP00000351905	0	0	0	0	0.226
TGFBR1	PIK3R1	ENSP00000364133	ENSP00000428056	0	0	0	0	0.518
S100B	NFKB2	ENSP00000291700	ENSP00000358983	0	0	0	0	0
ADRB2	CCL4	ENSP00000305372	ENSP00000482259	0	0	0	0.065	0
TLR2	IL1B	ENSP00000260010	ENSP00000263341	0	0	0	0.28	0
NRG1	PIK3R1	ENSP00000384620	ENSP00000428056	0	0	0	0	0
SDC2	JUN	ENSP00000307046	ENSP00000360266	0	0	0	0	0
SDC2	PIK3R1	ENSP00000307046	ENSP00000428056	0	0	0	0	0.105
S100A12	NFKB2	ENSP00000357726	ENSP00000358983	0	0	0	0	0
FOS	SDC2	ENSP00000306245	ENSP00000307046	0	0	0	0	0
TLR2	TLR4	ENSP00000260010	ENSP00000363089	0	0	0	0.263	0
AKT3	PML	ENSP00000263826	ENSP00000268058	0	0	0	0	0.057
SDC2	VEGFA	ENSP00000307046	ENSP00000478570	0	0	0	0.062	0
TLR4	TLR5	ENSP00000363089	ENSP00000440643	0	0	0	0.062	0.213
AKT3	PIK3R1	ENSP00000263826	ENSP00000428056	0	0	0	0.062	0.102
PTGS2	VEGFA	ENSP00000356438	ENSP00000478570	0	0	0	0.083	0
CCL20	CCL4	ENSP00000351671	ENSP00000482259	0	0	0	0.1	0
MMP9	TNF	ENSP00000361405	ENSP00000398698	0	0	0	0.176	0
AKT3	JUN	ENSP00000263826	ENSP00000360266	0	0	0	0	0.057
FOS	ZFP36	ENSP00000306245	ENSP00000469647	0	0	0	0.793	0
S100A12	TLR4	ENSP00000357726	ENSP00000363089	0	0	0	0.183	0
TLR2	TLR5	ENSP00000260010	ENSP00000440643	0	0	0	0.122	0
IL1B	MMP9	ENSP00000263341	ENSP00000361405	0	0	0	0.2	0.058
PML	JUN	ENSP00000268058	ENSP00000360266	0	0	0	0	0.848
TNF	VEGFA	ENSP00000398698	ENSP00000478570	0	0	0	0	0
PTGS2	TNF	ENSP00000356438	ENSP00000398698	0	0	0	0.096	0
IL1B	VEGFA	ENSP00000263341	ENSP00000478570	0	0	0	0	0
CXCR2	CCL4	ENSP00000319635	ENSP00000482259	0	0	0	0.089	0
JUN	MMP9	ENSP00000360266	ENSP00000361405	0	0	0	0	0.486
TLR2	HSPA6	ENSP00000260010	ENSP00000310219	0	0	0	0.159	0.102
TLR4	PIK3R1	ENSP00000363089	ENSP00000428056	0	0	0	0.064	0
MMP9	TLR4	ENSP00000361405	ENSP00000363089	0	0	0	0.116	0
S100B	S100P	ENSP00000291700	ENSP00000296370	0	0	0	0	0.834
CX3CR1	CCL4	ENSP00000351059	ENSP00000482259	0	0	0	0.076	0
RXRA	PIK3R1	ENSP00000419692	ENSP00000428056	0	0	0	0	0.292
TREM1	TLR2	ENSP00000244709	ENSP00000260010	0	0	0	0.361	0
FXR1	G3BP1	ENSP00000350170	ENSP00000377681	0	0	0	0.113	0.502
FOS	NR4A2	ENSP00000306245	ENSP00000344479	0	0	0	0.561	0.146
CXCR2	CCL20	ENSP00000319635	ENSP00000351671	0	0	0	0	0
IFIH1	RNASEL	ENSP00000263642	ENSP00000356530	0	0	0	0.078	0.056
TLR2	CLEC4E	ENSP00000260010	ENSP00000299663	0	0	0	0.469	0.056
CEBPB	FOS	ENSP00000305422	ENSP00000306245	0	0	0	0.188	0.078
NR4A2	RXRA	ENSP00000344479	ENSP00000419692	0	0	0	0	0.75
CX3CR1	CCL20	ENSP00000351059	ENSP00000351671	0	0	0	0	0
JUN	NR5A1	ENSP00000360266	ENSP00000362690	0	0	0	0	0.486
G3BP1	JMJD6	ENSP00000377681	ENSP00000394085	0	0	0	0.054	0.27
TGFBR2	PIK3R1	ENSP00000351905	ENSP00000428056	0	0	0	0	0.695
TLR2	MMP9	ENSP00000260010	ENSP00000361405	0	0	0	0.165	0
ARG1	TNF	ENSP00000349446	ENSP00000398698	0	0	0	0	0
PTGS2	TLR4	ENSP00000356438	ENSP00000363089	0	0	0	0.14	0
TLR2	IRAK3	ENSP00000260010	ENSP00000261233	0	0	0	0.268	0.128
NAMPT	TLR4	ENSP00000222553	ENSP00000363089	0	0	0	0.068	0
PTGS2	MMP9	ENSP00000356438	ENSP00000361405	0	0	0	0.097	0
TREM1	TREML4	ENSP00000244709	ENSP00000342570	0	0	0	0.358	0
IL1B	ARG1	ENSP00000263341	ENSP00000349446	0	0	0	0.062	0
IFIH1	NFKB2	ENSP00000263642	ENSP00000358983	0	0	0	0.106	0
IRAK3	TLR4	ENSP00000261233	ENSP00000363089	0	0	0	0.164	0.128
JUN	CDC42	ENSP00000360266	ENSP00000383118	0	0	0	0.062	0.257
PTGS2	JUN	ENSP00000356438	ENSP00000360266	0	0	0	0.066	0
CFP	C5AR1	ENSP00000247153	ENSP00000347197	0	0	0	0.151	0
MMP9	PLAU	ENSP00000361405	ENSP00000361850	0	0	0	0.076	0
TREM1	IL1B	ENSP00000244709	ENSP00000263341	0	0	0	0.352	0
CFP	CFH	ENSP00000247153	ENSP00000356399	0	0	0	0	0
TNF	TLR5	ENSP00000398698	ENSP00000440643	0	0	0	0	0
IL1B	TLR5	ENSP00000263341	ENSP00000440643	0	0	0	0.062	0
JUN	TLR4	ENSP00000360266	ENSP00000363089	0	0	0	0	0
VEGFA	CCL4	ENSP00000478570	ENSP00000482259	0	0	0	0	0
NAMPT	TNF	ENSP00000222553	ENSP00000398698	0	0	0	0.065	0
TNF	ZFP36	ENSP00000398698	ENSP00000469647	0	0	0	0.097	0.27
NFKB2	TNF	ENSP00000358983	ENSP00000398698	0	0	0	0.118	0
TLR4	CCL4	ENSP00000363089	ENSP00000482259	0	0	0	0.2	0
TLR2	CCL4	ENSP00000260010	ENSP00000482259	0	0	0	0.262	0
CEBPB	PTGS2	ENSP00000305422	ENSP00000356438	0	0	0	0.152	0.27
IL1B	CX3CR1	ENSP00000263341	ENSP00000351059	0	0	0	0.065	0
CEBPB	TNF	ENSP00000305422	ENSP00000398698	0	0	0	0.085	0
IL1B	CXCR2	ENSP00000263341	ENSP00000319635	0	0	0	0.098	0
CX3CR1	TNF	ENSP00000351059	ENSP00000398698	0	0	0	0	0
CD1D	TNF	ENSP00000357153	ENSP00000398698	0	0	0	0.069	0
FOS	VEGFA	ENSP00000306245	ENSP00000478570	0	0	0	0	0.273
PURA	FXR1	ENSP00000332706	ENSP00000350170	0	0	0	0.065	0.369
NR1I2	NRIP1	ENSP00000336528	ENSP00000383063	0	0	0	0	0.166
IL1B	FOS	ENSP00000263341	ENSP00000306245	0	0	0	0.064	0
FOS	PTGS2	ENSP00000306245	ENSP00000356438	0	0	0	0.109	0
CISH	PIK3R1	ENSP00000409346	ENSP00000428056	0	0	0	0.122	0.23
TLR2	IFIH1	ENSP00000260010	ENSP00000263642	0	0	0	0.136	0
FOS	CDC42	ENSP00000306245	ENSP00000383118	0	0	0	0.065	0.397
IFIH1	TLR4	ENSP00000263642	ENSP00000363089	0	0	0	0.097	0
IL1B	CEBPB	ENSP00000263341	ENSP00000305422	0	0	0	0.117	0
CD14	TNF	ENSP00000304236	ENSP00000398698	0	0	0	0.121	0
FXR1	CDC42	ENSP00000350170	ENSP00000383118	0	0	0	0.052	0.247
CXCR2	TNF	ENSP00000319635	ENSP00000398698	0	0	0	0.065	0
TSLP	TNF	ENSP00000339804	ENSP00000398698	0	0	0	0	0
CXCR2	VEGFA	ENSP00000319635	ENSP00000478570	0	0	0	0	0
IL1B	CD14	ENSP00000263341	ENSP00000304236	0	0	0	0.255	0
FOS	MMP9	ENSP00000306245	ENSP00000361405	0	0	0	0.062	0
ARG1	VEGFA	ENSP00000349446	ENSP00000478570	0	0	0	0	0
PLAU	VEGFA	ENSP00000361850	ENSP00000478570	0	0	0	0.069	0
TLR2	CXCR2	ENSP00000260010	ENSP00000319635	0	0	0	0.136	0
TSLP	IFNGR1	ENSP00000339804	ENSP00000356713	0	0	0	0	0
CLEC4E	TLR4	ENSP00000299663	ENSP00000363089	0	0	0	0.157	0.056
NR5A1	NRIP1	ENSP00000362690	ENSP00000383063	0	0	0	0	0.486
IFIH1	TNF	ENSP00000263642	ENSP00000398698	0	0	0	0.142	0
TGFBR1	CDC42	ENSP00000364133	ENSP00000383118	0	0	0	0.062	0.14
TLR4	VEGFA	ENSP00000363089	ENSP00000478570	0	0	0	0	0
TREM1	TNF	ENSP00000244709	ENSP00000398698	0	0	0	0.159	0
IL1B	IFIH1	ENSP00000263341	ENSP00000263642	0	0	0	0.139	0
TLR2	PTGS2	ENSP00000260010	ENSP00000356438	0	0	0	0.103	0
CX3CR1	TLR4	ENSP00000351059	ENSP00000363089	0	0	0	0.099	0
IL1B	TSLP	ENSP00000263341	ENSP00000339804	0	0	0	0	0
CEBPB	GSK3B	ENSP00000305422	ENSP00000324806	0	0	0	0	0.329
CEBPB	TLR4	ENSP00000305422	ENSP00000363089	0	0	0	0.097	0
NFKB2	TLR4	ENSP00000358983	ENSP00000363089	0	0	0	0.062	0.072
TLR2	JUN	ENSP00000260010	ENSP00000360266	0	0	0	0	0
ANPEP	TNF	ENSP00000300060	ENSP00000398698	0	0	0	0.062	0
IL1B	CLEC4E	ENSP00000263341	ENSP00000299663	0	0	0	0.248	0
JAG1	VEGFA	ENSP00000254958	ENSP00000478570	0	0	0	0.069	0
ARG1	TLR4	ENSP00000349446	ENSP00000363089	0	0	0	0.065	0
TNF	CISH	ENSP00000398698	ENSP00000409346	0	0	0	0.077	0
MMP9	CCL4	ENSP00000361405	ENSP00000482259	0	0	0	0.152	0
IL1B	S100B	ENSP00000263341	ENSP00000291700	0	0	0	0	0
IL1B	C5AR1	ENSP00000263341	ENSP00000347197	0	0	0	0.147	0
GSK3B	TCF7L2	ENSP00000324806	ENSP00000358404	0	0	0	0	0.123
CDC42	TNF	ENSP00000383118	ENSP00000398698	0	0	0	0.052	0.27
ATG7	FXR1	ENSP00000346437	ENSP00000350170	0	0	0	0.053	0
IRAK3	TNF	ENSP00000261233	ENSP00000398698	0	0	0	0.097	0.056
CXCR2	MMP9	ENSP00000319635	ENSP00000361405	0	0	0	0.09	0.057
NAMPT	IL1B	ENSP00000222553	ENSP00000263341	0	0	0	0.142	0
IL1B	S100A12	ENSP00000263341	ENSP00000357726	0	0	0	0.28	0
CFH	VEGFA	ENSP00000356399	ENSP00000478570	0	0	0	0.062	0
CTSS	MMP9	ENSP00000357981	ENSP00000361405	0	0	0	0.133	0
NR5A1	IPMK	ENSP00000362690	ENSP00000363046	0	0	0	0	0
C5AR1	TNF	ENSP00000347197	ENSP00000398698	0	0	0	0.098	0
ARG1	PTGS2	ENSP00000349446	ENSP00000356438	0	0	0	0	0
PTX3	VEGFA	ENSP00000295927	ENSP00000478570	0	0	0	0.06	0
NFKB2	JUN	ENSP00000358983	ENSP00000360266	0	0	0	0.063	0
CD1D	TLR4	ENSP00000357153	ENSP00000363089	0	0	0	0.102	0
IL1B	CD1D	ENSP00000263341	ENSP00000357153	0	0	0	0.096	0
GSK3B	TNF	ENSP00000324806	ENSP00000398698	0	0	0	0	0.056
TGFBR2	TNF	ENSP00000351905	ENSP00000398698	0	0	0	0.062	0.056
TLR2	CX3CR1	ENSP00000260010	ENSP00000351059	0	0	0	0.098	0
AQP9	S100A12	ENSP00000219919	ENSP00000357726	0	0	0	0.522	0
ANPEP	CXCR2	ENSP00000300060	ENSP00000319635	0	0	0	0	0
TLR2	CCL20	ENSP00000260010	ENSP00000351671	0	0	0	0.063	0
IL1B	CISH	ENSP00000263341	ENSP00000409346	0	0	0	0.085	0
AQP9	TLR2	ENSP00000219919	ENSP00000260010	0	0	0	0.551	0.056
IL1B	PLAU	ENSP00000263341	ENSP00000361850	0	0	0	0.076	0
GSK3B	CDC42	ENSP00000324806	ENSP00000383118	0	0	0	0.042	0.14
IL1B	PTX3	ENSP00000263341	ENSP00000295927	0	0	0	0.082	0
FOS	TLR4	ENSP00000306245	ENSP00000363089	0	0	0	0.063	0.056
JUN	ZFP36	ENSP00000360266	ENSP00000469647	0	0	0	0.298	0
CLEC4E	TNF	ENSP00000299663	ENSP00000398698	0	0	0	0.163	0
CISH	PIK3R1	ENSP00000409346	ENSP00000428056	0	0	0	0	0
FXR1	DDX17	ENSP00000350170	ENSP00000380033	0	0	0	0.089	0.344
IRAK3	TLR5	ENSP00000261233	ENSP00000440643	0	0	0	0.076	0.128
TSLP	CCL20	ENSP00000339804	ENSP00000351671	0	0	0	0.072	0
AQP9	TREM1	ENSP00000219919	ENSP00000244709	0	0	0	0.54	0
TLR2	ARG1	ENSP00000260010	ENSP00000349446	0	0	0	0.076	0
CXCR2	TLR4	ENSP00000319635	ENSP00000363089	0	0	0	0.066	0
TREM1	S100A12	ENSP00000244709	ENSP00000357726	0	0	0	0.454	0
S100B	TNF	ENSP00000291700	ENSP00000398698	0	0	0	0	0
JUN	NRIP1	ENSP00000360266	ENSP00000383063	0	0	0	0	0.27
PTX3	TNF	ENSP00000295927	ENSP00000398698	0	0	0	0	0
ARG1	MMP9	ENSP00000349446	ENSP00000361405	0	0	0	0	0
CCL20	TLR4	ENSP00000351671	ENSP00000363089	0	0	0	0	0
ARG1	CX3CR1	ENSP00000349446	ENSP00000351059	0	0	0	0.065	0
PIK3R1	SOCS2	ENSP00000428056	ENSP00000481249	0	0	0	0	0
ADRB2	TNF	ENSP00000305372	ENSP00000398698	0	0	0	0.065	0
CD1D	CTSS	ENSP00000357153	ENSP00000357981	0	0	0	0.098	0
TREM1	CCL4	ENSP00000244709	ENSP00000482259	0	0	0	0.301	0
TLR2	NFKB2	ENSP00000260010	ENSP00000358983	0	0	0	0.071	0.072
TSLP	TLR4	ENSP00000339804	ENSP00000363089	0	0	0	0	0
IFNGR1	TNF	ENSP00000356713	ENSP00000398698	0	0	0	0.062	0
TLR2	TSLP	ENSP00000260010	ENSP00000339804	0	0	0	0	0
CD14	MAFB	ENSP00000304236	ENSP00000362410	0	0	0	0.53	0
C5AR1	CFH	ENSP00000347197	ENSP00000356399	0	0	0	0.11	0
TLR2	CD1D	ENSP00000260010	ENSP00000357153	0	0	0	0.098	0
IL1B	NRG1	ENSP00000263341	ENSP00000384620	0	0	0	0	0
ANPEP	CD1D	ENSP00000300060	ENSP00000357153	0	0	0	0.098	0
NR4A2	JUN	ENSP00000344479	ENSP00000360266	0	0	0	0.16	0.105
IL1B	ADRB2	ENSP00000263341	ENSP00000305372	0	0	0	0.088	0.213
S100B	S100A12	ENSP00000291700	ENSP00000357726	0	0	0	0	0
JUN	TGFBR1	ENSP00000360266	ENSP00000364133	0	0	0	0	0.121
AQP9	CD14	ENSP00000219919	ENSP00000304236	0	0	0	0.537	0
TLR2	S100A12	ENSP00000260010	ENSP00000357726	0	0	0	0.324	0
TNF	SOCS2	ENSP00000398698	ENSP00000481249	0	0	0	0	0
GSK3B	MMP9	ENSP00000324806	ENSP00000361405	0	0	0	0	0
IL1B	SLPI	ENSP00000263341	ENSP00000342082	0	0	0	0.094	0
CCL20	VEGFA	ENSP00000351671	ENSP00000478570	0	0	0	0.065	0
TREM1	C5AR1	ENSP00000244709	ENSP00000347197	0	0	0	0.332	0
IFIH1	TLR5	ENSP00000263642	ENSP00000440643	0	0	0	0.062	0
SLPI	CCL20	ENSP00000342082	ENSP00000351671	0	0	0	0.098	0
PML	RXRA	ENSP00000268058	ENSP00000419692	0	0	0	0	0.512
TLR2	VEGFA	ENSP00000260010	ENSP00000478570	0	0	0	0	0
TLR4	CISH	ENSP00000363089	ENSP00000409346	0	0	0	0	0.056
MMP9	CDC42	ENSP00000361405	ENSP00000383118	0	0	0	0	0
TGFBR1	VEGFA	ENSP00000364133	ENSP00000478570	0	0	0	0	0
CEBPB	NR5A1	ENSP00000305422	ENSP00000362690	0	0	0	0	0.345
CEBPB	ARG1	ENSP00000305422	ENSP00000349446	0	0	0	0.081	0
CCL20	PTGS2	ENSP00000351671	ENSP00000356438	0	0	0	0.148	0
TLR2	CTSS	ENSP00000260010	ENSP00000357981	0	0	0	0.412	0
CXCR2	ARG1	ENSP00000319635	ENSP00000349446	0	0	0	0.069	0
PMAIP1	JUN	ENSP00000326119	ENSP00000360266	0	0	0	0	0
S100A12	TNF	ENSP00000357726	ENSP00000398698	0	0	0	0.135	0
MMP9	TGFBR1	ENSP00000361405	ENSP00000364133	0	0	0	0.062	0
PTGS2	PLAU	ENSP00000356438	ENSP00000361850	0	0	0	0.103	0.056
RGS2	ADRB2	ENSP00000235382	ENSP00000305372	0	0	0	0	0.203
TGFBR2	VEGFA	ENSP00000351905	ENSP00000478570	0	0	0	0.062	0
PTGS2	CCL4	ENSP00000356438	ENSP00000482259	0	0	0	0.111	0
S100A12	MMP9	ENSP00000357726	ENSP00000361405	0	0	0	0.226	0
IFNGR1	TLR4	ENSP00000356713	ENSP00000363089	0	0	0	0.105	0
TCF7L2	NR5A1	ENSP00000358404	ENSP00000362690	0	0	0	0	0.182
GSK3B	VEGFA	ENSP00000324806	ENSP00000478570	0	0	0	0	0
IL1B	GSK3B	ENSP00000263341	ENSP00000324806	0	0	0	0	0.056
S100B	MMP9	ENSP00000291700	ENSP00000361405	0	0	0	0	0
CFP	PTX3	ENSP00000247153	ENSP00000295927	0	0	0	0	0.27
CX3CR1	VEGFA	ENSP00000351059	ENSP00000478570	0	0	0	0	0
TCF7L2	NR4A3	ENSP00000358404	ENSP00000482027	0	0	0	0	0.394
JUN	PLAU	ENSP00000360266	ENSP00000361850	0	0	0	0	0
PLAU	TNF	ENSP00000361850	ENSP00000398698	0	0	0	0.062	0
TPH1	FOS	ENSP00000250018	ENSP00000306245	0	0	0	0	0
JAG1	PTCH1	ENSP00000254958	ENSP00000332353	0	0	0	0.049	0.102
FOS	IFNGR1	ENSP00000306245	ENSP00000356713	0	0	0	0	0.385
PTGS2	ZFP36	ENSP00000356438	ENSP00000469647	0	0	0	0.116	0
GSK3B	PTGS2	ENSP00000324806	ENSP00000356438	0	0	0	0	0.077
RGS2	FOS	ENSP00000235382	ENSP00000306245	0	0	0	0.185	0
FOS	PIK3R1	ENSP00000306245	ENSP00000428056	0	0	0	0	0.182
PTX3	PTGS2	ENSP00000295927	ENSP00000356438	0	0	0	0.151	0
TNF	TGFBR2	ENSP00000398698	ENSP00000351905	0	0	0	0.069	0.064
CLEC4E	CEBPB	ENSP00000299663	ENSP00000305422	0	0	0	0.062	0
SLPI	TNF	ENSP00000342082	ENSP00000398698	0	0	0	0.062	0
CCL20	MMP9	ENSP00000351671	ENSP00000361405	0	0	0	0.078	0
TLR2	FOS	ENSP00000260010	ENSP00000306245	0	0	0	0.077	0.056
PTGS2	NFKB2	ENSP00000356438	ENSP00000358983	0	0	0	0.089	0
TLR2	IFNGR1	ENSP00000260010	ENSP00000356713	0	0	0	0.138	0
IL1B	IFNGR1	ENSP00000263341	ENSP00000356713	0	0	0	0.062	0
PLK1	CDC42	ENSP00000300093	ENSP00000383118	0	0	0	0	0.148
CD14	S100A12	ENSP00000304236	ENSP00000357726	0	0	0	0.336	0
CEBPB	RXRA	ENSP00000305422	ENSP00000419692	0	0	0	0.095	0.069
IRAK3	CISH	ENSP00000261233	ENSP00000409346	0	0	0	0	0.103
CEBPB	MMP9	ENSP00000305422	ENSP00000361405	0	0	0	0.185	0
IL1B	FFAR2	ENSP00000263341	ENSP00000473159	0	0	0	0.078	0
AKT3	CDC42	ENSP00000263826	ENSP00000383118	0	0	0	0.063	0.14
IL1B	ATG7	ENSP00000263341	ENSP00000346437	0	0	0	0	0
TLR2	CISH	ENSP00000260010	ENSP00000409346	0	0	0	0.065	0.056
CD14	CCL4	ENSP00000304236	ENSP00000482259	0	0	0	0.326	0
TLR4	FFAR2	ENSP00000363089	ENSP00000473159	0	0	0	0	0
JAG1	TGFBR1	ENSP00000254958	ENSP00000364133	0	0	0	0.062	0.142
FOS	CDC42	ENSP00000306245	ENSP00000383118	0	0	0	0	0.078
ANPEP	VEGFA	ENSP00000300060	ENSP00000478570	0	0	0	0.062	0
CEBPB	VEGFA	ENSP00000305422	ENSP00000478570	0	0	0	0.076	0
FOS	NFKB2	ENSP00000306245	ENSP00000358983	0	0	0	0.062	0.056
CDC42	TLR5	ENSP00000383118	ENSP00000440643	0	0	0	0	0.125
ATG7	TNF	ENSP00000346437	ENSP00000398698	0	0	0	0	0
RGS2	ZFP36	ENSP00000235382	ENSP00000469647	0	0	0	0.14	0
IFIH1	G3BP1	ENSP00000263642	ENSP00000377681	0	0	0	0	0.168
TGFBR2	MMP9	ENSP00000351905	ENSP00000361405	0	0	0	0.062	0
CCL20	TLR5	ENSP00000351671	ENSP00000440643	0	0	0	0	0
JUN	CISH	ENSP00000360266	ENSP00000409346	0	0	0	0.062	0
RNASEL	TLR4	ENSP00000356530	ENSP00000363089	0.042	0	0	0.062	0.145
G3BP1	ZFP36	ENSP00000377681	ENSP00000469647	0	0	0	0.067	0
ARG1	CCL4	ENSP00000349446	ENSP00000482259	0	0	0	0	0
ANPEP	CD14	ENSP00000300060	ENSP00000304236	0	0	0	0.15	0
FOS	GSK3B	ENSP00000306245	ENSP00000324806	0	0	0	0	0.11
CX3CR1	MMP9	ENSP00000351059	ENSP00000361405	0	0	0	0	0
TLR4	CDC42	ENSP00000363089	ENSP00000383118	0	0	0	0.077	0.125
CCL20	CD1D	ENSP00000351671	ENSP00000357153	0	0	0	0	0
S100B	VEGFA	ENSP00000291700	ENSP00000478570	0	0	0	0	0
PTCH1	VEGFA	ENSP00000332353	ENSP00000478570	0	0	0	0	0
C5AR1	CCL4	ENSP00000347197	ENSP00000482259	0	0	0	0.228	0
TREM1	IRAK3	ENSP00000244709	ENSP00000261233	0	0	0	0.179	0
PLK1	JUN	ENSP00000300093	ENSP00000360266	0	0	0	0.062	0.129
JAG1	TNF	ENSP00000254958	ENSP00000398698	0	0	0	0	0.06
GSK3B	TLR4	ENSP00000324806	ENSP00000363089	0	0	0	0	0.089
CTSS	TLR4	ENSP00000357981	ENSP00000363089	0	0	0	0.295	0
C5AR1	CTSS	ENSP00000347197	ENSP00000357981	0	0	0	0.342	0
IL1B	ZFP36	ENSP00000263341	ENSP00000469647	0	0	0	0.105	0
NFIL3	CEBPB	ENSP00000297689	ENSP00000305422	0	0	0	0.141	0
CEBPB	NFKB2	ENSP00000305422	ENSP00000358983	0	0	0	0.108	0.058
CD14	CX3CR1	ENSP00000304236	ENSP00000351059	0	0	0	0.14	0
NFIL3	JUN	ENSP00000297689	ENSP00000360266	0	0	0	0.063	0.102
JUN	NR4A3	ENSP00000360266	ENSP00000482027	0	0	0	0.09	0.105
TLR2	FFAR2	ENSP00000260010	ENSP00000473159	0	0	0	0.069	0
IFIH1	CCL4	ENSP00000263642	ENSP00000482259	0	0	0	0.118	0
RNASEL	G3BP1	ENSP00000356530	ENSP00000377681	0	0	0	0	0.102
PMAIP1	TNF	ENSP00000326119	ENSP00000398698	0	0	0	0.057	0
TREM1	MMP9	ENSP00000244709	ENSP00000361405	0	0	0	0.199	0
TREM1	CLEC4E	ENSP00000244709	ENSP00000299663	0	0	0	0.184	0
NAMPT	VEGFA	ENSP00000222553	ENSP00000478570	0	0	0	0.062	0
RGS2	NR4A2	ENSP00000235382	ENSP00000344479	0	0	0	0.15	0
GSK3B	PIK3R1	ENSP00000324806	ENSP00000428056	0	0	0	0.062	0.102
TLR5	CCL4	ENSP00000440643	ENSP00000482259	0	0	0	0.077	0
IFNGR1	CISH	ENSP00000356713	ENSP00000409346	0	0	0	0	0.057
JUN	PIK3R1	ENSP00000360266	ENSP00000428056	0	0	0	0	0.094
JAG1	MMP9	ENSP00000254958	ENSP00000361405	0	0	0	0	0.061
TGFBR1	TNF	ENSP00000364133	ENSP00000398698	0	0	0	0	0.056
JAG1	GSK3B	ENSP00000254958	ENSP00000324806	0	0	0	0	0.144
CLEC4E	TLR5	ENSP00000299663	ENSP00000440643	0	0	0	0.09	0.056
CCL20	S100A12	ENSP00000351671	ENSP00000357726	0	0	0	0	0
CD14	ADRB2	ENSP00000304236	ENSP00000305372	0	0	0	0.07	0.064
FXR1	TNF	ENSP00000350170	ENSP00000398698	0	0	0	0	0
G3BP1	TGFBR1	ENSP00000377681	ENSP00000364133	0	0	0	0.077	0.178
TGFBR2	JUN	ENSP00000351905	ENSP00000360266	0	0	0	0.08	0.057
IL1B	CFH	ENSP00000263341	ENSP00000356399	0	0	0	0.065	0
NR1I2	TLR4	ENSP00000336528	ENSP00000363089	0	0	0	0	0.074
PLAU	CDC42	ENSP00000361850	ENSP00000383118	0	0	0	0	0.056
IL1B	TGFBR2	ENSP00000263341	ENSP00000351905	0	0	0	0.076	0.056
PTX3	MMP9	ENSP00000295927	ENSP00000361405	0	0	0	0	0
NR4A2	TNF	ENSP00000344479	ENSP00000398698	0	0	0	0	0.182
SLPI	MMP9	ENSP00000342082	ENSP00000361405	0	0	0	0.062	0
AQP9	IL1B	ENSP00000219919	ENSP00000263341	0	0	0	0.333	0
TREM1	CX3CR1	ENSP00000244709	ENSP00000351059	0	0	0	0.126	0
TLR2	CEBPB	ENSP00000260010	ENSP00000305422	0	0	0	0.09	0
IL1B	SOCS2	ENSP00000263341	ENSP00000481249	0	0	0	0.062	0
IL1B	NR1I2	ENSP00000263341	ENSP00000336528	0	0	0	0	0
JAG1	CDC42	ENSP00000254958	ENSP00000383118	0	0	0	0	0.119
IL1B	TGFBR1	ENSP00000263341	ENSP00000364133	0	0	0	0	0.056
CXCR2	PTGS2	ENSP00000319635	ENSP00000356438	0	0	0	0	0.056
TSLP	TLR5	ENSP00000339804	ENSP00000440643	0	0	0	0	0
CD14	TLR5	ENSP00000304236	ENSP00000440643	0	0	0	0.138	0.056
CEBPB	MAFB	ENSP00000305422	ENSP00000362410	0	0	0	0.098	0.132
NR1I2	TNF	ENSP00000336528	ENSP00000398698	0	0	0	0	0
CX3CR1	TLR5	ENSP00000351059	ENSP00000440643	0	0	0	0.07	0
TREM1	CD14	ENSP00000244709	ENSP00000304236	0	0	0	0.344	0
PTX3	TLR4	ENSP00000295927	ENSP00000363089	0	0	0	0.069	0
FOS	PLAU	ENSP00000306245	ENSP00000361850	0	0	0	0	0
NAMPT	PTGS2	ENSP00000222553	ENSP00000356438	0	0	0	0.161	0
NFKB2	MMP9	ENSP00000358983	ENSP00000361405	0	0	0	0.097	0
CDC42	MYO10	ENSP00000383118	ENSP00000421280	0	0	0	0.051	0.139
AKT3	VEGFA	ENSP00000263826	ENSP00000478570	0	0	0	0	0
CD14	MMP9	ENSP00000304236	ENSP00000361405	0	0	0	0.211	0
NR1I2	VEGFA	ENSP00000336528	ENSP00000478570	0	0	0	0	0
CX3CR1	CFH	ENSP00000351059	ENSP00000356399	0	0	0	0	0
JUN	TLR5	ENSP00000360266	ENSP00000440643	0	0	0	0	0
TLR2	PTX3	ENSP00000260010	ENSP00000295927	0	0	0	0.062	0
CEBPB	TCF7L2	ENSP00000305422	ENSP00000358404	0	0	0	0	0.223
MMP9	MAFB	ENSP00000361405	ENSP00000362410	0	0	0	0.139	0.27
NAMPT	NFIL3	ENSP00000222553	ENSP00000297689	0	0	0	0.272	0
TREM1	IFNGR1	ENSP00000244709	ENSP00000356713	0	0	0	0.069	0
ATG7	TLR4	ENSP00000346437	ENSP00000363089	0	0	0	0.058	0.059
ATG7	JUN	ENSP00000346437	ENSP00000360266	0	0	0	0	0
CD1D	CCL4	ENSP00000357153	ENSP00000482259	0	0	0	0.076	0
NFIL3	FOS	ENSP00000297689	ENSP00000306245	0	0	0	0.097	0.078
JAG1	TGFBR2	ENSP00000254958	ENSP00000351905	0	0	0	0.08	0.08
PURA	G3BP1	ENSP00000332706	ENSP00000377681	0	0	0	0.046	0.27
IL1B	CDC42	ENSP00000263341	ENSP00000383118	0	0	0	0.055	0
JAG1	JUN	ENSP00000254958	ENSP00000360266	0	0	0	0	0
GSK3B	PTCH1	ENSP00000324806	ENSP00000332353	0	0	0	0	0.058
PTCH1	TGFBR1	ENSP00000332353	ENSP00000364133	0	0	0	0.062	0.111
CFH	TLR4	ENSP00000356399	ENSP00000363089	0	0	0	0.162	0
CD14	CTSS	ENSP00000304236	ENSP00000357981	0	0	0	0.281	0
S100A12	CCL4	ENSP00000357726	ENSP00000482259	0	0	0	0.217	0
IFIH1	JUN	ENSP00000263642	ENSP00000360266	0	0	0	0	0
S100B	TLR4	ENSP00000291700	ENSP00000363089	0	0	0	0	0
CFH	TNF	ENSP00000356399	ENSP00000398698	0	0	0	0	0
CTSS	TNF	ENSP00000357981	ENSP00000398698	0	0	0	0.17	0
NR1I2	JUN	ENSP00000336528	ENSP00000360266	0	0	0	0	0.066
IL1B	ANPEP	ENSP00000263341	ENSP00000300060	0	0	0	0.152	0
CXCR2	S100A12	ENSP00000319635	ENSP00000357726	0	0	0	0.299	0
NR4A2	PTGS2	ENSP00000344479	ENSP00000356438	0	0	0	0.153	0
CFP	TLR2	ENSP00000247153	ENSP00000260010	0	0	0	0.179	0.086
NR4A2	NR4A3	ENSP00000344479	ENSP00000482027	0	0	0	0.376	0
MMP9	NRG1	ENSP00000361405	ENSP00000384620	0	0	0	0	0
