# Supplementary material for: Identification of immune-related genes in acute myocardial infarction based on integrated bioinformatical methods and experimental verification
Source: PeerJ. 2023 May 16;11:e15058. doi: 10.7717/peerj.15058 (PMC10198157; doi:10.7717/peerj.15058)
Supplement: Supplemental Information 3 [file peerj-11-15058-s003.xlsx]

## Sheet: Sheet1
Well	Sample Name	Target Name	Task	Reporter	Quencher	RQ	RQ Min	RQ Max	Cт	Cт Mean	Cт SD	ΔCт	ΔCт Mean	ΔCт SE	HK Control ΔCт Mean	HK Control ΔCт SE	ΔΔCт	Automatic Ct Threshold	Ct Threshold	Automatic Baseline	Baseline Start	Baseline End	Efficiency	Tm1	Tm2	Tm3	Comments	HIGHSD	OUTLIERRG	MTP
A1	CON 1	SOCS2	UNKNOWN	SYBR	None	1	0.239574	14.3221	29.1199	28.7559	0.457263	11.8815	11.1664	0.106654				TRUE	1.31567	TRUE	3	22	1	82.6592				Y	N	N
A2	CON 2	SOCS2	UNKNOWN	SYBR	None	1	0.239574	14.3221	28.165	28.7559	0.457263	10.2315	11.1664	0.106654				TRUE	1.0431	TRUE	3	17	1	82.6592				Y	N	N
A3	CON 3	SOCS2	UNKNOWN	SYBR	None	1	0.239574	14.3221	28.3891	28.7559	0.457263	10.5501	11.1664	0.106654				TRUE	1.0431	TRUE	3	22	1	82.6592				Y	N	N
A4	CON 4	SOCS2	UNKNOWN	SYBR	None	1	0.239574	14.3221	28.4367	28.7559	0.457263	11.1723	11.1664	0.106654				TRUE	1.0431	TRUE	3	21	1	83.0369				Y	N	N
A5	CON 5	SOCS2	UNKNOWN	SYBR	None	1	0.239574	14.3221	29.4569	28.7559	0.457263	11.9981	11.1664	0.106654				TRUE	0.291717	TRUE	3	22	1	83.0369				Y	N	N
A6	CON 6	SOCS2	UNKNOWN	SYBR	None	1	0.239574	14.3221	28.9681	28.7559	0.457263	11.1648	11.1664	0.106654				TRUE	0.291717	TRUE	3	16	1	83.0369				Y	N	N
B1	AMI 1	SOCS2	UNKNOWN	SYBR	None	0.687639	0.186763	16.4909	27.4772	26.7123	0.613517	10.1118	9.28172	0.105475				TRUE	0.291717	TRUE	3	22	1	82.6592				Y	N	N
B2	AMI 2	SOCS2	UNKNOWN	SYBR	None	0.687639	0.186763	16.4909	26.2505	26.7123	0.613517	8.65617	9.28172	0.105475				TRUE	1.31567	TRUE	3	24	1	82.848				N	N	N
B3	AMI 3	SOCS2	UNKNOWN	SYBR	None	0.687639	0.186763	16.4909	25.7401	26.7123	0.613517	8.36108	9.28172	0.105475				TRUE	1.31567	TRUE	3	22	1	82.4704				N	N	N
B4	AMI 4	SOCS2	UNKNOWN	SYBR	None	0.687639	0.186763	16.4909	26.6208	26.7123	0.613517	9.38992	9.28172	0.105475				TRUE	1.31567	TRUE	3	23	1	83.6033				N	N	N
B5	AMI 5	SOCS2	UNKNOWN	SYBR	None	0.687639	0.186763	16.4909	27.4222	26.7123	0.613517	9.95895	9.28172	0.105475				TRUE	1.0431	TRUE	3	19	1	81.9039				N	N	N
B6	AMI 6	SOCS2	UNKNOWN	SYBR	None	0.687639	0.186763	16.4909	26.7628	26.7123	0.613517	9.21246	9.28172	0.105475				TRUE	1.0431	TRUE	3	18	1	62.0771				N	N	N
C1	CON 1	FFAR2	UNKNOWN	SYBR	None	2.69783	0.624041	4.23399	30.0238	29.7121	0.334212	12.7854	12.1225	0.0764131				TRUE	1.0431	TRUE	3	11	1	88.1352				N	N	N
C2	CON 2	FFAR2	UNKNOWN	SYBR	None	2.69783	0.624041	4.23399	29.678	29.7121	0.334212	11.7445	12.1225	0.0764131				TRUE	0.291717	TRUE	3	10	1	88.1352				N	N	N
C3	CON 3	FFAR2	UNKNOWN	SYBR	None	2.69783	0.624041	4.23399	29.4655	29.7121	0.334212	11.6265	12.1225	0.0764131				TRUE	0.291717	TRUE	3	12	1	87.9464				N	N	N
C4	CON 4	FFAR2	UNKNOWN	SYBR	None	2.69783	0.624041	4.23399	29.8345	29.7121	0.334212	12.5701	12.1225	0.0764131				TRUE	0.291717	TRUE	3	16	1	82.848				N	N	N
C5	CON 5	FFAR2	UNKNOWN	SYBR	None	2.69783	0.624041	4.23399	29.1432	29.7121	0.334212	11.6844	12.1225	0.0764131				TRUE	1.31567	TRUE	3	12	1	83.0369				N	N	N
C6	CON 6	FFAR2	UNKNOWN	SYBR	None	2.69783	0.624041	4.23399	30.1274	29.7121	0.334212	12.3241	12.1225	0.0764131				TRUE	1.31567	TRUE	3	18	1	82.6592				Y	N	N
D1	AMI 1	FFAR2	UNKNOWN	SYBR	None	4.5201	1.34844	14.3909	29.4548	28.6762	0.419978	12.0894	11.2457	0.0790004				TRUE	1.31567	TRUE	3	17	1	82.6592				Y	N	N
D2	AMI 2	FFAR2	UNKNOWN	SYBR	None	4.5201	1.34844	14.3909	28.5233	28.6762	0.419978	10.929	11.2457	0.0790004				TRUE	1.0431	TRUE	3	18	1	82.2816				Y	N	N
D3	AMI 3	FFAR2	UNKNOWN	SYBR	None	4.5201	1.34844	14.3909	28.3365	28.6762	0.419978	10.9575	11.2457	0.0790004				TRUE	1.0431	TRUE	3	19	1	81.7151				Y	N	N
D4	AMI 4	FFAR2	UNKNOWN	SYBR	None	4.5201	1.34844	14.3909	28.845	28.6762	0.419978	11.6141	11.2457	0.0790004				TRUE	1.0431	TRUE	3	10	1	88.1352				Y	N	N
D5	AMI 5	FFAR2	UNKNOWN	SYBR	None	4.5201	1.34844	14.3909	28.1477	28.6762	0.419978	10.6844	11.2457	0.0790004				TRUE	0.291717	TRUE	3	11	1	88.324				N	N	N
D6	AMI 6	FFAR2	UNKNOWN	SYBR	None	4.5201	1.34844	14.3909	28.7501	28.6762	0.419978	11.1998	11.2457	0.0790004				TRUE	0.291717	TRUE	3	15	1	87.9464				N	N	N
E1	CON 1	MYO10	UNKNOWN	SYBR	None	0.18324	0.00343988	2.45909	28.7419	28.5169	0.344125	11.5035	10.9273	0.0984637				TRUE	0.291717	TRUE	3	11	1	83.0369				N	N	N
E2	CON 2	MYO10	UNKNOWN	SYBR	None	0.18324	0.00343988	2.45909	28.4377	28.5169	0.344125	10.5042	10.9273	0.0984637				TRUE	1.31567	TRUE	3	10	1	83.2257				N	N	N
E3	CON 3	MYO10	UNKNOWN	SYBR	None	0.18324	0.00343988	2.45909	28.2891	28.5169	0.344125	10.4501	10.9273	0.0984637				TRUE	1.31567	TRUE	3	13	1	82.848				N	N	N
E4	CON 4	MYO10	UNKNOWN	SYBR	None	0.18324	0.00343988	2.45909	29.1296	28.5169	0.344125	11.8652	10.9273	0.0984637				TRUE	1.31567	TRUE	3	14	1	83.0369				Y	N	N
E5	CON 5	MYO10	UNKNOWN	SYBR	None	0.18324	0.00343988	2.45909	28.4582	28.5169	0.344125	10.9993	10.9273	0.0984637				TRUE	1.0431	TRUE	3	17	1	82.6592				Y	N	N
E6	CON 6	MYO10	UNKNOWN	SYBR	None	0.18324	0.00343988	2.45909	28.0448	28.5169	0.344125	10.2415	10.9273	0.0984637				TRUE	1.0431	TRUE	3	14	1	82.6592				Y	N	N
F1	AMI 1	MYO10	UNKNOWN	SYBR	None	1.22906	0.190983	11.8574	27.0371	26.7542	0.562985	9.67166	9.32369	0.109135				TRUE	1.0431	TRUE	3	18	1	88.324				Y	N	N
F2	AMI 2	MYO10	UNKNOWN	SYBR	None	1.22906	0.190983	11.8574	26.6286	26.7542	0.562985	9.03427	9.32369	0.109135				TRUE	0.291717	TRUE	3	20	1	88.324				Y	N	N
F3	AMI 3	MYO10	UNKNOWN	SYBR	None	1.22906	0.190983	11.8574	26.2203	26.7542	0.562985	8.84128	9.32369	0.109135				TRUE	0.291717	TRUE	3	12	1	88.1352				N	N	N
F4	AMI 4	MYO10	UNKNOWN	SYBR	None	1.22906	0.190983	11.8574	27.7344	26.7542	0.562985	10.5035	9.32369	0.109135				TRUE	0.291717	TRUE	3	11	1	83.2257				N	N	N
F5	AMI 5	MYO10	UNKNOWN	SYBR	None	1.22906	0.190983	11.8574	26.8873	26.7542	0.562985	9.42403	9.32369	0.109135				TRUE	1.31567	TRUE	3	10	1	83.2257				N	N	N
F6	AMI 6	MYO10	UNKNOWN	SYBR	None	1.22906	0.190983	11.8574	26.0178	26.7542	0.562985	8.46746	9.32369	0.109135				TRUE	1.31567	TRUE	3	18	1	82.848				N	N	N
G1	CON 1	ACTIN	UNKNOWN	SYBR	None				17.2384	17.5896	0.280598	0						TRUE	1.31567	TRUE	3	16	1	83.2257				N	N	N
G2	CON 2	ACTIN	UNKNOWN	SYBR	None				17.9335	17.5896	0.280598	0						TRUE	1.0431	TRUE	3	22	1	83.0369				N	N	N
G3	CON 3	ACTIN	UNKNOWN	SYBR	None				17.839	17.5896	0.280598	0						TRUE	1.0431	TRUE	3	14	1	82.848				N	N	N
G4	CON 4	ACTIN	UNKNOWN	SYBR	None				17.2643	17.5896	0.280598	0						TRUE	1.0431	TRUE	3	17	1	88.324				Y	N	N
G5	CON 5	ACTIN	UNKNOWN	SYBR	None				17.4588	17.5896	0.280598	0						TRUE	0.291717	TRUE	3	13	1	88.324				Y	N	N
G6	CON 6	ACTIN	UNKNOWN	SYBR	None				17.8033	17.5896	0.280598	0						TRUE	0.291717	TRUE	3	10	1	88.1352				Y	N	N
H1	AMI 1	ACTIN	UNKNOWN	SYBR	None				17.3654	17.4305	0.121778	0						TRUE	0.291717	TRUE	3	11	1	83.0369				Y	N	N
H2	AMI 2	ACTIN	UNKNOWN	SYBR	None				17.5943	17.4305	0.121778	0						TRUE	1.31567	TRUE	3	17	1	83.4145				N	N	N
H3	AMI 3	ACTIN	UNKNOWN	SYBR	None				17.379	17.4305	0.121778	0						TRUE	1.31567	TRUE	3	19	1	83.0369				N	N	N
H4	AMI 4	ACTIN	UNKNOWN	SYBR	None				17.2309	17.4305	0.121778	0						TRUE	1.31567	TRUE	3	20	1	83.2257				N	N	N
H5	AMI 5	ACTIN	UNKNOWN	SYBR	None				17.4633	17.4305	0.121778	0						TRUE	1.0431	TRUE	3	14	1	83.0369				N	N	N
H6	AMI 6	ACTIN	UNKNOWN	SYBR	None				17.5503	17.4305	0.121778	0						TRUE	1.0431	TRUE	3	17	1	83.2257				N	N	N
